# Supplementary material for: Ca2+-doped ultrathin cobalt hydroxyl oxides derived from coordination polymers as efficient electrocatalysts for the oxidation of water
Source: Royal Society of Chemistry journal article supplement (doi:10.1039/c9ta05882f), 2019-01-01
Supplement: c9ta05882f1.pdf [file c9ta05882f1.pdf]

## Supporting information

### **Ca<sup>2+</sup> doped ultrathin cobalt hydroxyoxides from coordination polymers as efficient electrocatalysts for water oxidations**

Panpan Su<sup>a</sup>, Shuangshuang Ma<sup>a,b</sup>, Wenjuan Huang<sup>a,c</sup>, Yash Boyjoo<sup>a</sup>, Shiyang Bai<sup>b\*</sup>, and Jian Liu<sup>a,d,\*</sup>

<sup>a</sup>State Key Laboratory of Catalysis, Dalian Institute of Chemical Physics, Chinese Academy of Sciences, 457 Zhongshan Road, Dalian 116023, China, E-mail: jianliu@dicp.ac.cn

<sup>b</sup>Department of Chemistry and Chemical Engineering, Beijing University of Technology, 100 PingLeYuan, Chaoyang District, Beijing 100124, China

<sup>c</sup>College of Mathematics and Physics, Shanghai University of Electric Power, Shanghai, 200090, China

<sup>d</sup>DICP-Surrey Joint Centre for Future Materials, Department of Chemical and Process Engineering, University of Surrey, Guildford, Surrey, UK, E-mail: jian.liu@surrey.ac.uk

Table S1 Electrochemical impedance spectroscopy (EIS) fitting results.  $R_s$ : electrolyte resistance,  $R_{CT}$ : charge-transfer resistance.

| Catalysts                                  | $R_s$ /ohms | $R_{CT}$ /ohms |
|--------------------------------------------|-------------|----------------|
| Co-CPs                                     | 8.7         | 3.8            |
| Co <sub>0.91</sub> Ca <sub>0.09</sub> -CPs | 6.9         | 3.7            |
| Co <sub>0.89</sub> Ca <sub>0.11</sub> -CPs | 7.3         | 2.5            |
| Co <sub>0.83</sub> Ca <sub>0.17</sub> -CPs | 7.5         | 2.9            |

Table S2 Comparison of the OER performance of Co<sub>0.89</sub>Ca<sub>0.11</sub>-CPs with selected cobalt based catalysts from the literature. GC: glass carbon; NF: nickel foam.

| Catalyst                                                | Substrate | Electrolyte | $\eta@10 \text{ mA cm}^{-2}$ (V) | Tafel slopes ( $\text{mV dec}^{-1}$ ) | References                           |
|---------------------------------------------------------|-----------|-------------|----------------------------------|---------------------------------------|--------------------------------------|
| Co <sub>0.89</sub> Ca <sub>0.11</sub> -CPs              | GC        | 1.0 M KOH   | 0.37                             | 58.8                                  | This work                            |
| 2D Co-ZIF-9                                             | GC        | 1.0 M KOH   | 0.38                             | 55                                    | Adv. Sci. 2018, 5, 1801029           |
| CoP                                                     | NF        | 1.0 M KOH   | 0.39                             | 65                                    | Adv. Funct. Mater. 2015, 25, 7337    |
| CoOx-ZIF<br>ZIF-67                                      | GC        | 1.0 M KOH   | 0.32<br>0.40                     | 70.3<br>108.8                         | Adv. Funct. Mater. 2017, 27, 1702546 |
| Co(OH) <sub>2</sub> @NCNTs                              | NF        | 1.0 M KOH   | 0.27                             | 72                                    | Nano Energy, 2018, 47, 96            |
| Co <sub>3</sub> O <sub>4</sub> film                     | Au        | 1.0 M KOH   | 0.39                             | 61                                    | Electrochimica Acta 2014, 140, 359.  |
| Co@C-MWCNTs<br>Co <sub>3</sub> O <sub>4</sub> @C-MWCNTs | GC        | 1.0 M KOH   | 0.32<br>0.39                     | 67<br>62                              | J. Mater. Chem. A, 2015, 3, 17392    |
| Co <sub>3</sub> O <sub>4</sub> /CNW-C                   | GC        | 1.0 M KOH   | 0.41                             | 54                                    | J. Mater. Chem. A, 2015, 3, 11615    |

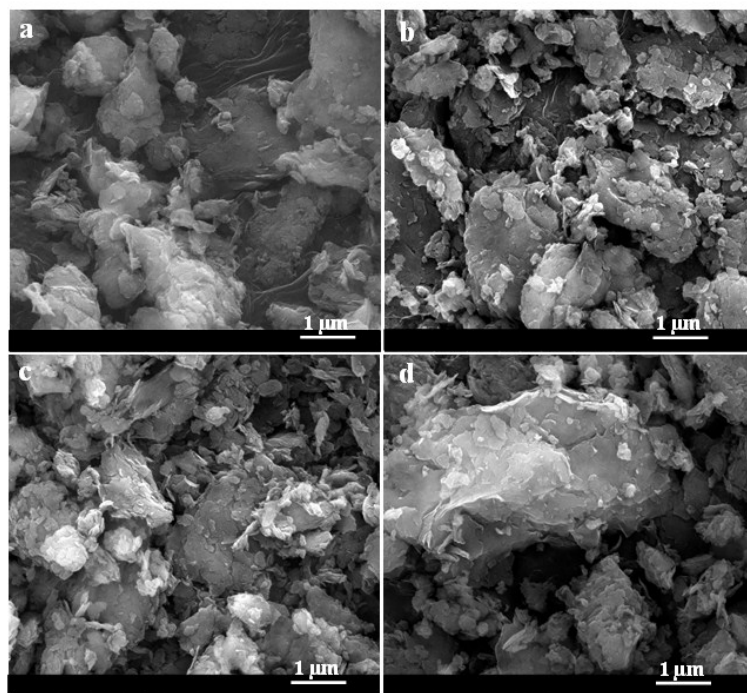

Fig. S1 SEM images of Co-CPs (a),  $\text{Co}_{0.91}\text{Ca}_{0.09}$ -CPs (b),  $\text{Co}_{0.89}\text{Ca}_{0.11}$ -CPs (c), and  $\text{Co}_{0.83}\text{Ca}_{0.17}$ -CPs (d).

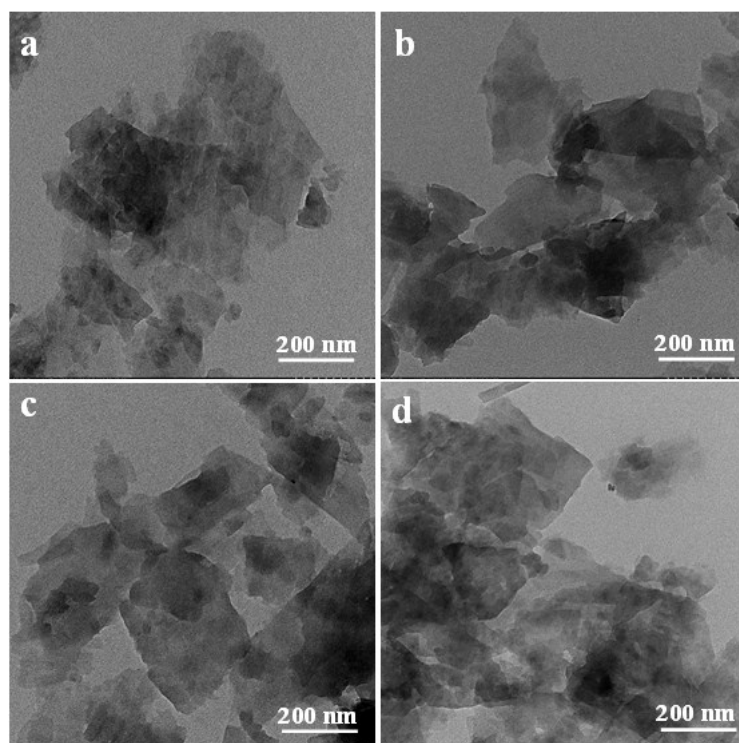

Fig. S2 TEM images of Co-CPs (a),  $\text{Co}_{0.91}\text{Ca}_{0.09}$ -CPs (b),  $\text{Co}_{0.89}\text{Ca}_{0.11}$ -CPs (c) and  $\text{Co}_{0.83}\text{Ca}_{0.17}$ -CPs (d).

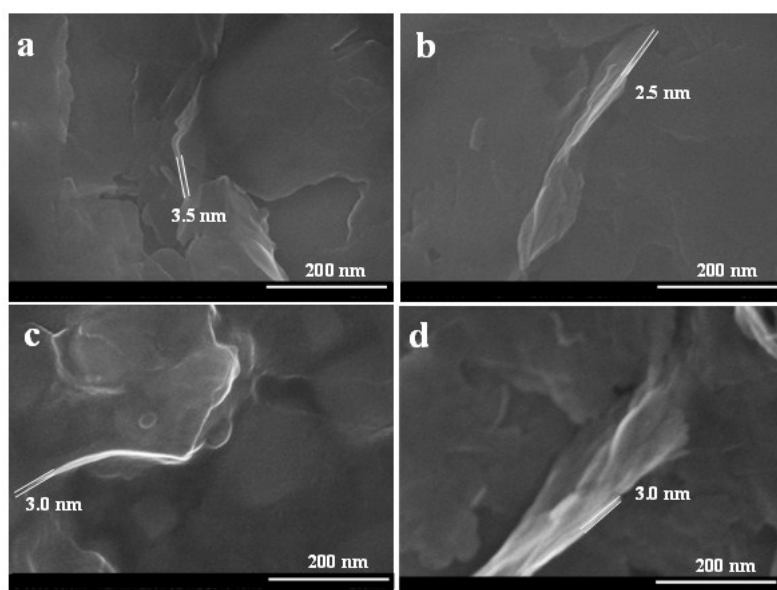

Fig. S3 HRSEM images of (a) Co-CPs, (b)  $\text{Co}_{0.91}\text{Ca}_{0.09}$ -CPs, (c)  $\text{Co}_{0.89}\text{Ca}_{0.11}$ -CPs and (d)  $\text{Co}_{0.83}\text{Ca}_{0.17}$ -CPs.

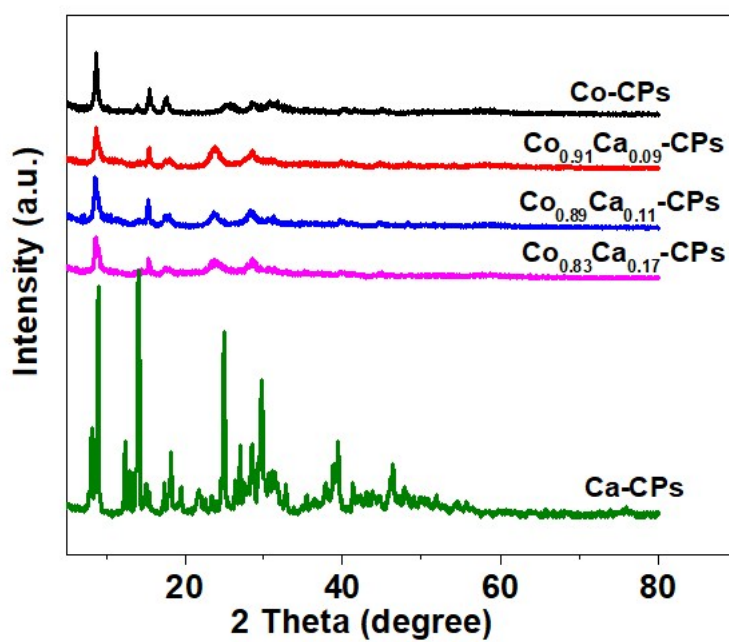

Fig. S4 XRD patterns of Co-CPs,  $\text{Co}_x\text{Ca}_y$ -CPs and Ca-CPs.

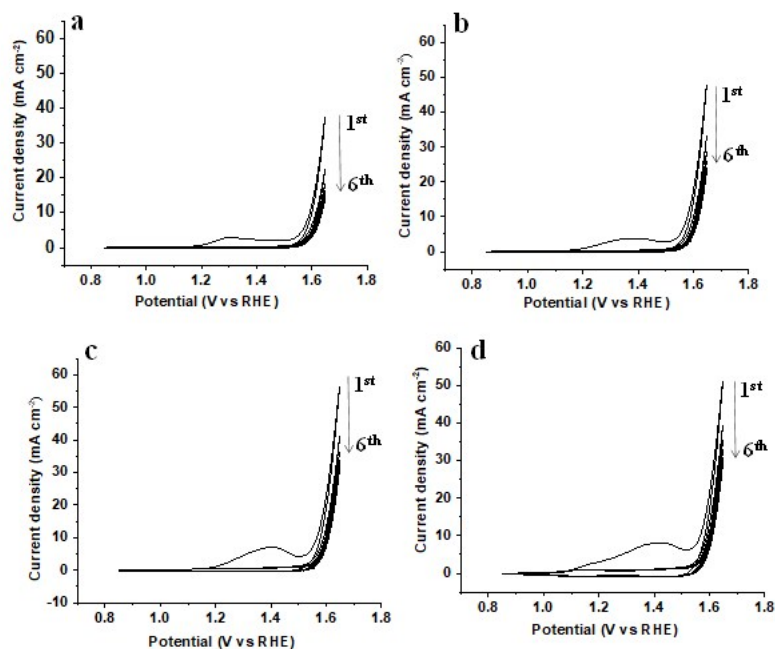

Fig. S5 Cyclic voltammetry (CV) curves without IR compensation during the potential range of 0.85V to 1.65V vs RHE in 1M KOH electrolyte for the catalysts: (a) Co-CPs, (b)  $\text{Co}_{0.91}\text{Ca}_{0.09}$ -CPs, (c)  $\text{Co}_{0.89}\text{Ca}_{0.11}$ -CPs and (d)  $\text{Co}_{0.83}\text{Ca}_{0.17}$ -CPs.

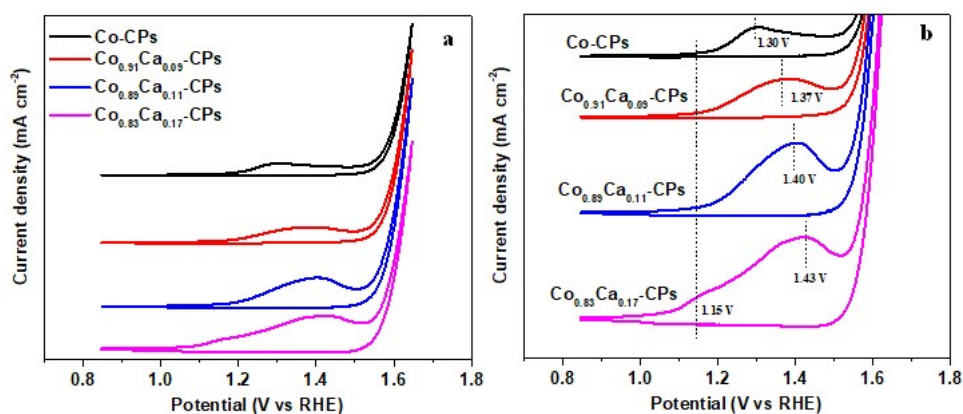

Fig. S6 The first CV curves for Co-CPs and  $\text{Co}_x\text{Ca}_y$ -CPs in 1 M KOH electrolyte.

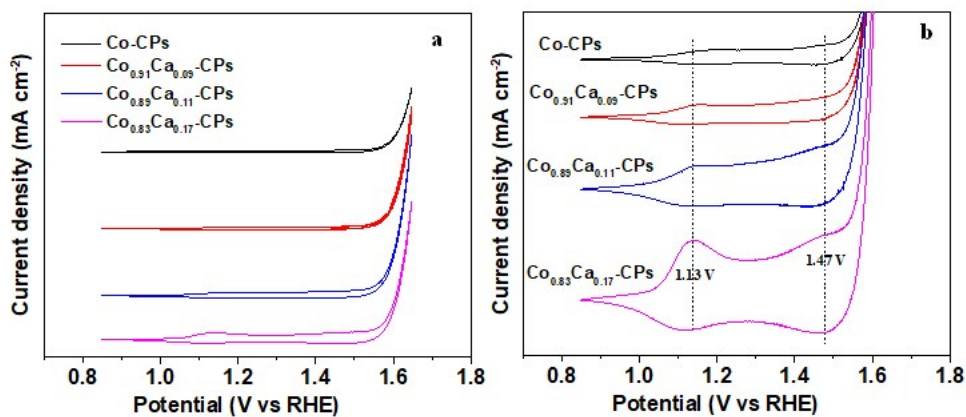

Fig. S7 The stable CV curves for Co-CPs and  $\text{Co}_x\text{Ca}_y$ -CPs in 1 M KOH electrolyte.

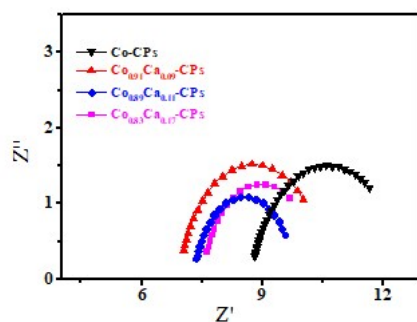

Fig. S8 EIS of anodic oxidized products of Co-CPs and  $\text{Co}_x\text{Ca}_y$ -CPs measured at a constant potential of 1.55 V versus RHE.

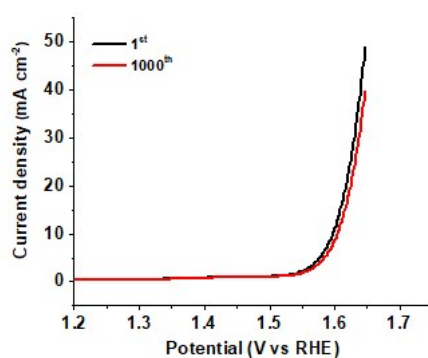

Fig. S9 LSV polarization curves of  $\text{Co}_{0.89}\text{Ca}_{0.11}$ -CPs before and after cycling for 1000 cycles.

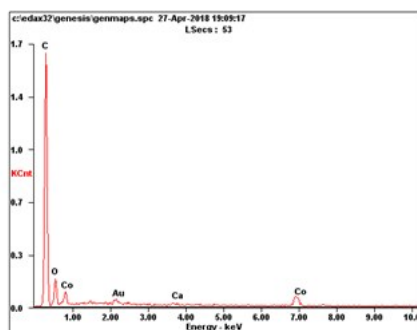

| Element | Wt%        | At%   |
|---------|------------|-------|
| CK      | 79.70      | 87.22 |
| OK      | 14.15      | 11.63 |
| AuM     | 01.61      | 00.11 |
| CaK     | 00.34      | 00.11 |
| CoK     | 04.19      | 00.93 |
| Matrix  | Correction | ZAF   |

Fig. S10 EDS result of  $\text{Co}_{0.89}\text{Ca}_{0.11}$ -CPs before OER stability test.

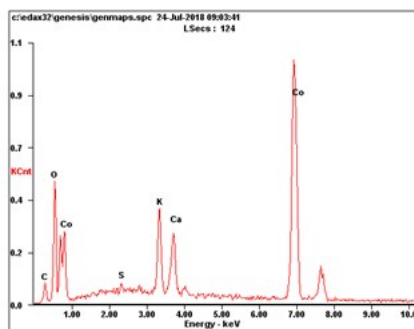

| Element | Wt%        | At%   |
|---------|------------|-------|
| CK      | 09.37      | 23.29 |
| OK      | 20.30      | 37.88 |
| SK      | 00.71      | 00.66 |
| KK      | 06.55      | 05.00 |
| CaK     | 05.13      | 03.82 |
| CoK     | 57.94      | 29.35 |
| Matrix  | Correction | ZAF   |

Fig. S11 EDS result of  $\text{Co}_{0.89}\text{Ca}_{0.11}$ -CPs after OER stability test.



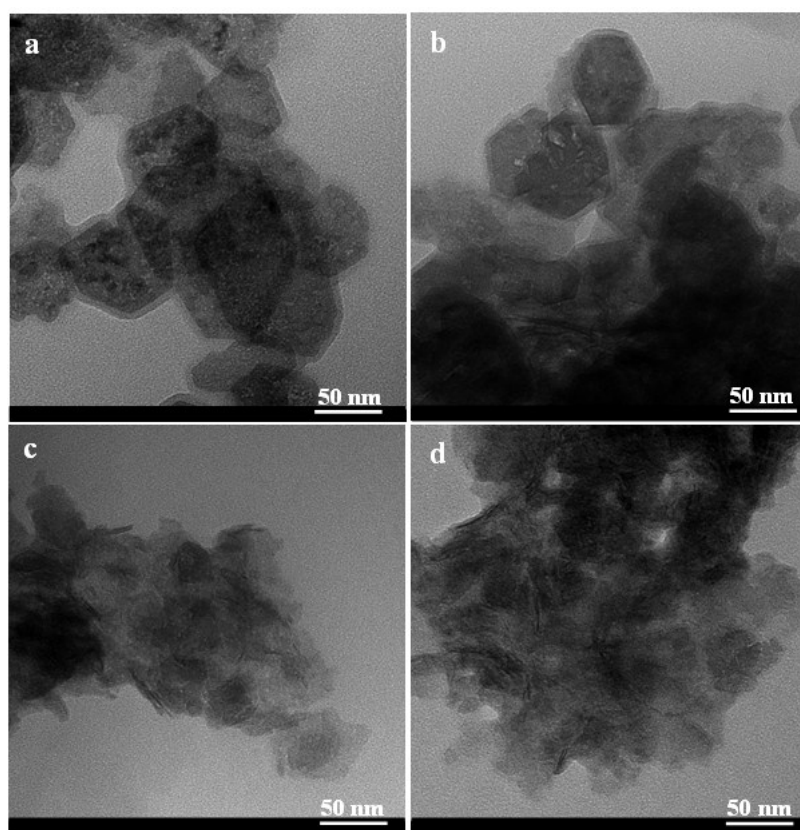

Fig. S12 TEM images of anodic oxidized products of Co-CPs (a),  $\text{Co}_{0.91}\text{Ca}_{0.09}$ -CPs (b),  $\text{Co}_{0.89}\text{Ca}_{0.11}$ -CPs (c) and  $\text{Co}_{0.83}\text{Ca}_{0.17}$ -CPs (d) in 1.0 M KOH aqueous electrolyte.

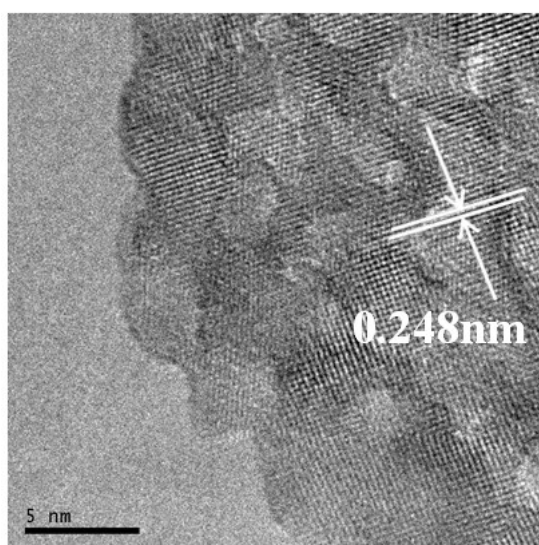

Fig. S13 HRTEM image of anodic oxidized product of Co-CPs after OER.

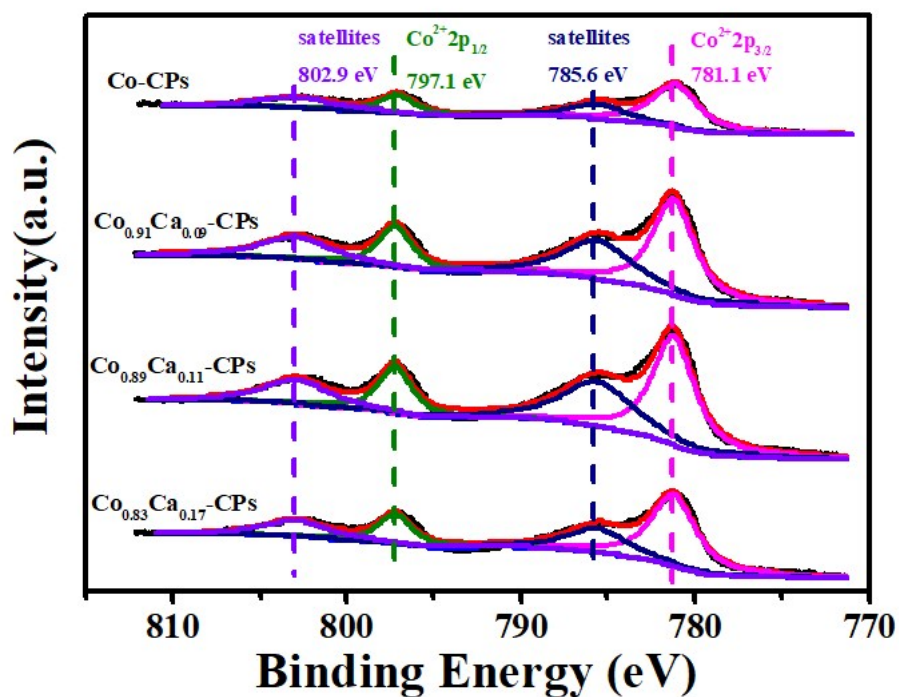

Fig. S14 XPS spectra of Co-2p of Co-CPs and  $\text{Co}_x\text{Ca}_y\text{-CPs}$ .

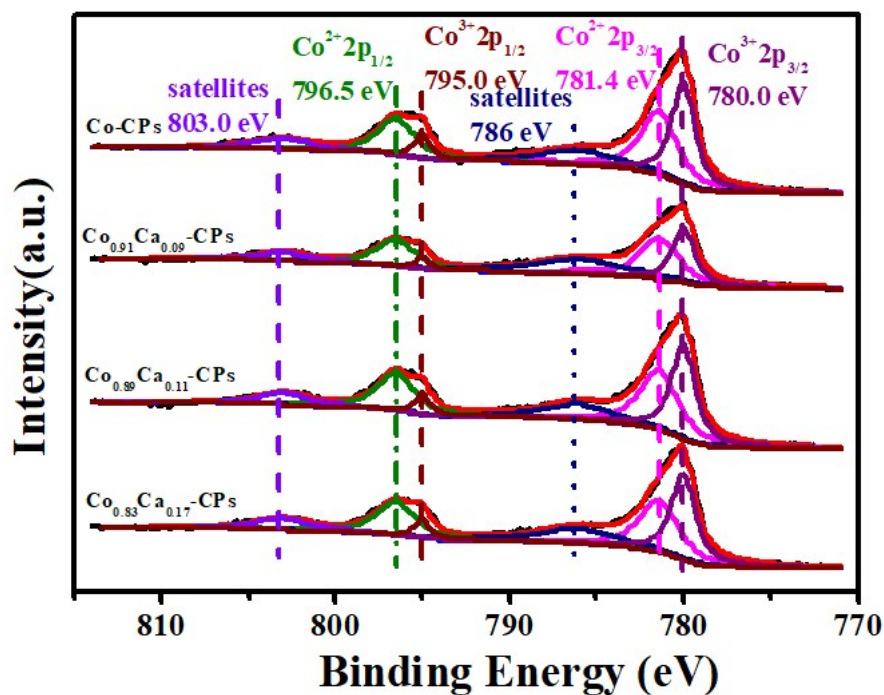

Fig. S15 XPS spectra of Co-2p for hydrolyzed samples of Co-CPs and  $\text{Co}_x\text{Ca}_y\text{-CPs}$  in 1 M KOH.



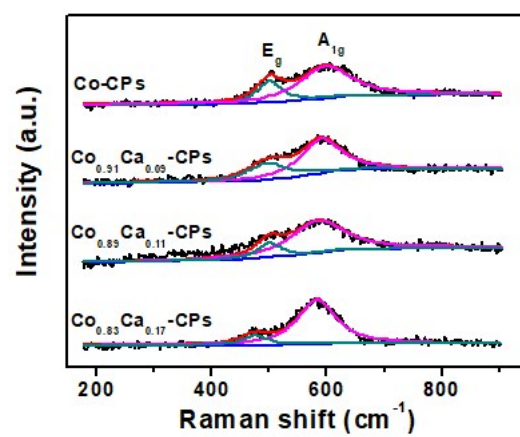

Fig. S16 Raman spectra of the anodic oxidized products of Co-CPs and Co<sub>x</sub>Ca<sub>y</sub>-CPs after OER.
